# Supplementary material for: The impact of drought on the productivity of two rainfed crops in Spain
Source: Copernicus journal article supplement (doi:10.5194/nhess-2019-1), 2019-01-09
Supplement: Supplementary file 1 [file nhess-2019-1-supplement.pdf]

## Supplementary Material

### The impact of drought on the productivity of two rainfed crops in Spain

Marina Peña-Gallardo<sup>1</sup>, Sergio Martín Vicente-Serrano<sup>1</sup>, Fernando Domínguez-Castro<sup>1</sup>, Santiago Beguería<sup>2</sup>

<sup>1</sup> Instituto Pirenaico de Ecología, Consejo Superior de Investigaciones Científicas (IPE-CSIC), Zaragoza, Spain.

<sup>2</sup> Estación Experimental de Aula Dei, Consejo Superior de Investigaciones Científicas (EEAD-CSIC), Zaragoza, Spain.

Supplementary Table 1. Relationship between provincial and agricultural district data, aggregated at the provincial scale, for wheat cultivation for the common period 1993–2014.

| Codes | Provinces      | r     | Codes | Provinces | r     |
|-------|----------------|-------|-------|-----------|-------|
| 1     | Álava          | 0.16  | 23    | Jaén      | 0.38* |
| 2     | Albacete       | 0.41* | 24    | León      | 0.69* |
| 3     | Alicante       | 0.1   | 25    | Lleida    | 0.52* |
| 4     | Almería        | 0.47* | 26    | La Rioja  | 0.35* |
| 5     | Ávila          | 0.77* | 28    | Madrid    | 0.81* |
| 6     | Badajoz        | 0.49* | 29    | Málaga    | 0.11  |
| 7     | Islas Baleares | -0.22 | 30    | Murcia    | 0.13  |
| 8     | Barcelona      | 0.69* | 31    | Navarra   | -0.25 |
| 9     | Burgos         | 0.82* | 32    | Ourense   | 0.37* |
| 10    | Cáceres        | 0.34* | 33    | Asturias  | -0.16 |
| 11    | Cádiz          | 0.32* | 34    | Palencia  | 0.73* |
| 12    | Castellón      | -0.19 | 37    | Salamanca | 0.87* |
| 13    | Ciudad Real    | 0.43* | 40    | Segovia   | 0.94* |
| 14    | Córdoba        | 0.46* | 41    | Sevilla   | 0.25  |
| 15    | A Coruña       | 0.1   | 42    | Soria     | 0.89* |
| 16    | Cuenca         | 0.86* | 43    | Tarragona | 0.54* |
| 17    | Girona         | 0.1   | 44    | Teruel    | 0.83* |

|           |                    |       |           |                   |       |
|-----------|--------------------|-------|-----------|-------------------|-------|
| <b>18</b> | <b>Granada</b>     | 0.3   | <b>45</b> | <b>Toledo</b>     | 0.48* |
| <b>19</b> | <b>Guadalajara</b> | 0.87* | <b>46</b> | <b>Valencia</b>   | 0.2   |
| <b>21</b> | <b>Huelva</b>      | 0.29  | <b>47</b> | <b>Valladolid</b> | 0.92* |
| <b>22</b> | <b>Huesca</b>      | 0.4*  | <b>49</b> | <b>Zamora</b>     | 0.75* |
|           |                    |       | <b>50</b> | <b>Zaragoza</b>   | 0.51* |

9

10

(\*) correlations are significant at  $p < 0.05$

11 Supplementary Table 2. Relationship between provincial and agricultural district data, aggregated at provincial scale, for  
12 barley cultivation for the common period 1993–2014.

| <b>Codes</b> | <b>Provinces</b>   | <b>r</b> |
|--------------|--------------------|----------|
| <b>1</b>     | <b>Álava</b>       | 0.11     |
| <b>2</b>     | <b>Albacete</b>    | 0.2      |
| <b>10</b>    | <b>Cáceres</b>     | 0.48*    |
| <b>11</b>    | <b>Cádiz</b>       | 0.32*    |
| <b>12</b>    | <b>Castellón</b>   | -0.14    |
| <b>13</b>    | <b>Ciudad Real</b> | 0.28     |
| <b>14</b>    | <b>Córdoba</b>     | 0.54*    |
| <b>15</b>    | <b>A Coruña</b>    | -0.09    |
| <b>16</b>    | <b>Cuenca</b>      | 0.88*    |
| <b>17</b>    | <b>Girona</b>      | 0.08     |
| <b>18</b>    | <b>Granada</b>     | 0.51*    |
| <b>19</b>    | <b>Guadalajara</b> | 0.86*    |
| <b>22</b>    | <b>Huelva</b>      | 0.57*    |
| <b>26</b>    | <b>La Rioja</b>    | 0.76*    |
| <b>31</b>    | <b>Navarra</b>     | 0.01     |
| <b>41</b>    | <b>Sevilla</b>     | -0.35*   |
| <b>43</b>    | <b>Tarragona</b>   | 0.88*    |

13

14  
15  
16

(\*) correlations are significant at  $p < 0.05$

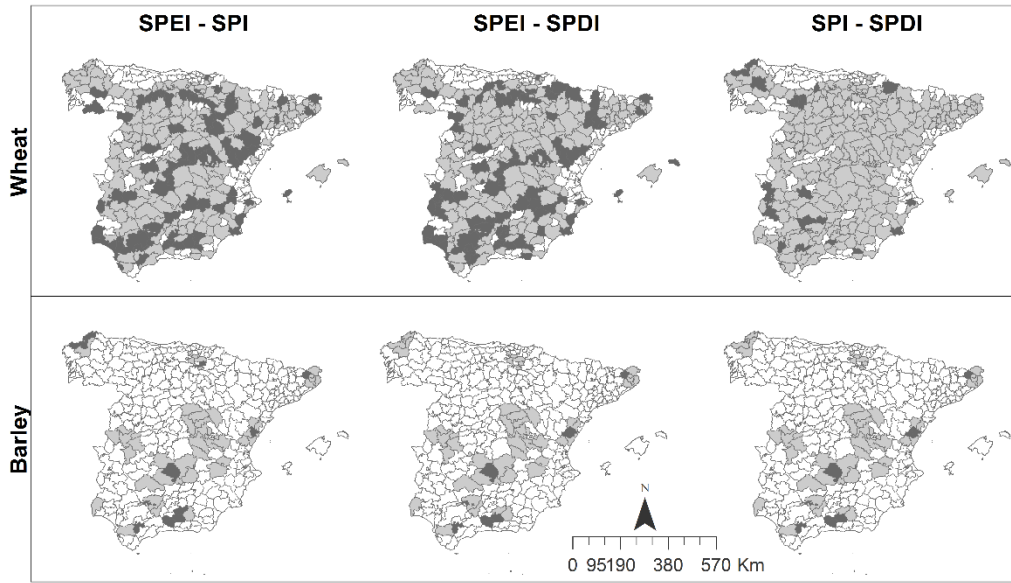

17  
18  
19

Supplementary Fig. 1. Spatial distribution of regions where significant differences (dark grey) and non significant differences (light grey) were found in the t-tests.

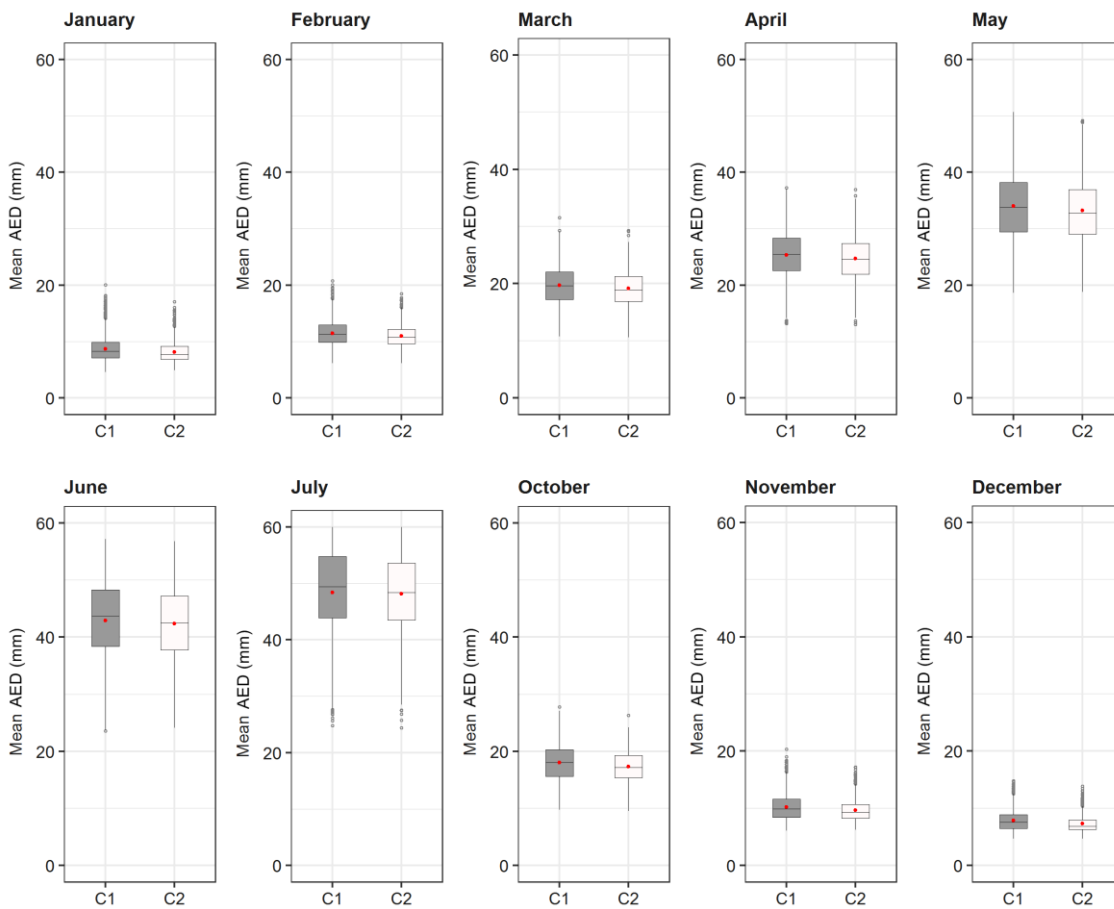

20

21 Supplementary Fig. 2. Monthly mean AED conditions in the agricultural districts where wheat was cultivated, classified into  
22 principal components (C1 and C2) for the period 1993–2015. The red dot shows the mean, and the black line shows the median.

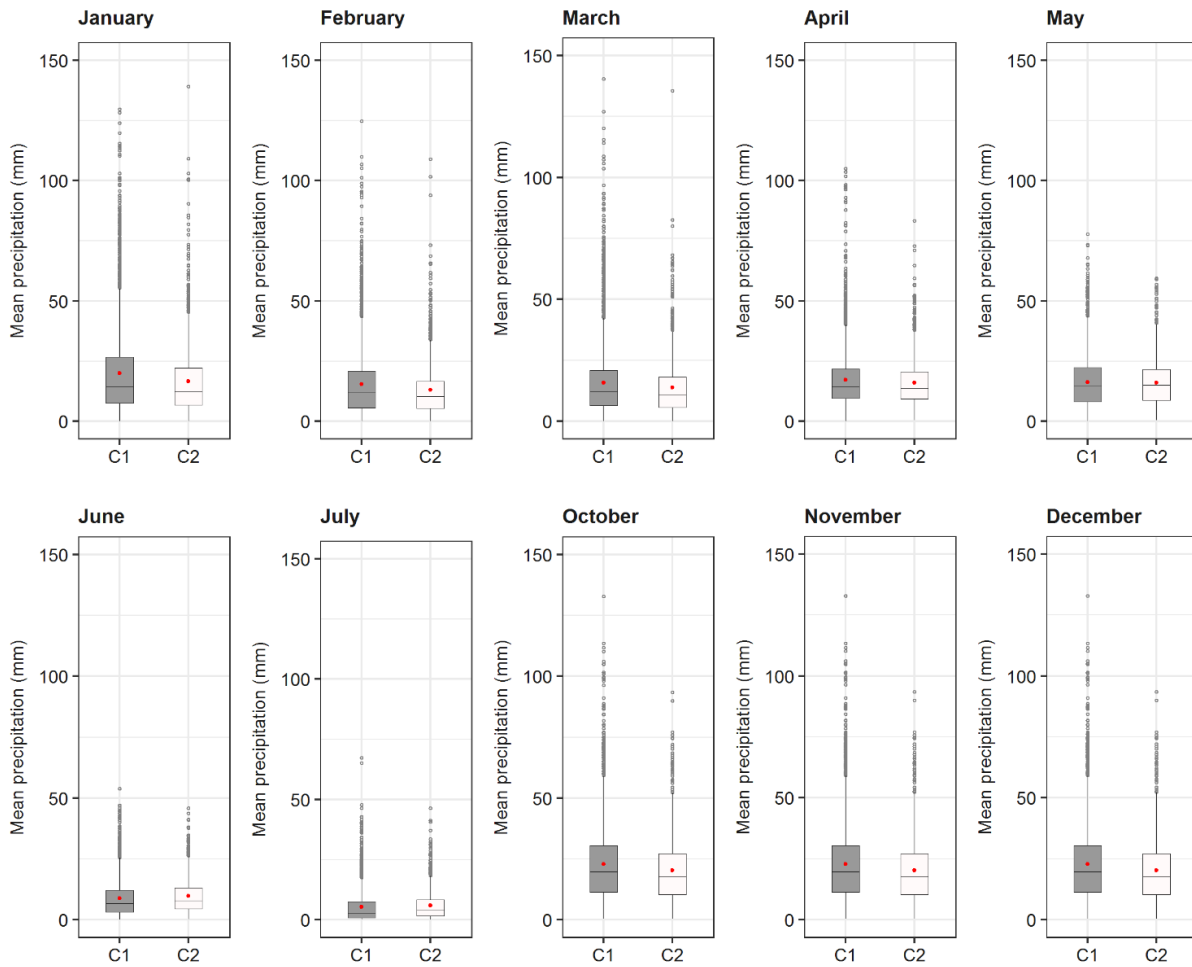

23

24 Supplementary Fig. 3. As for Supplementary Fig. 2, but for the monthly mean precipitation.

25

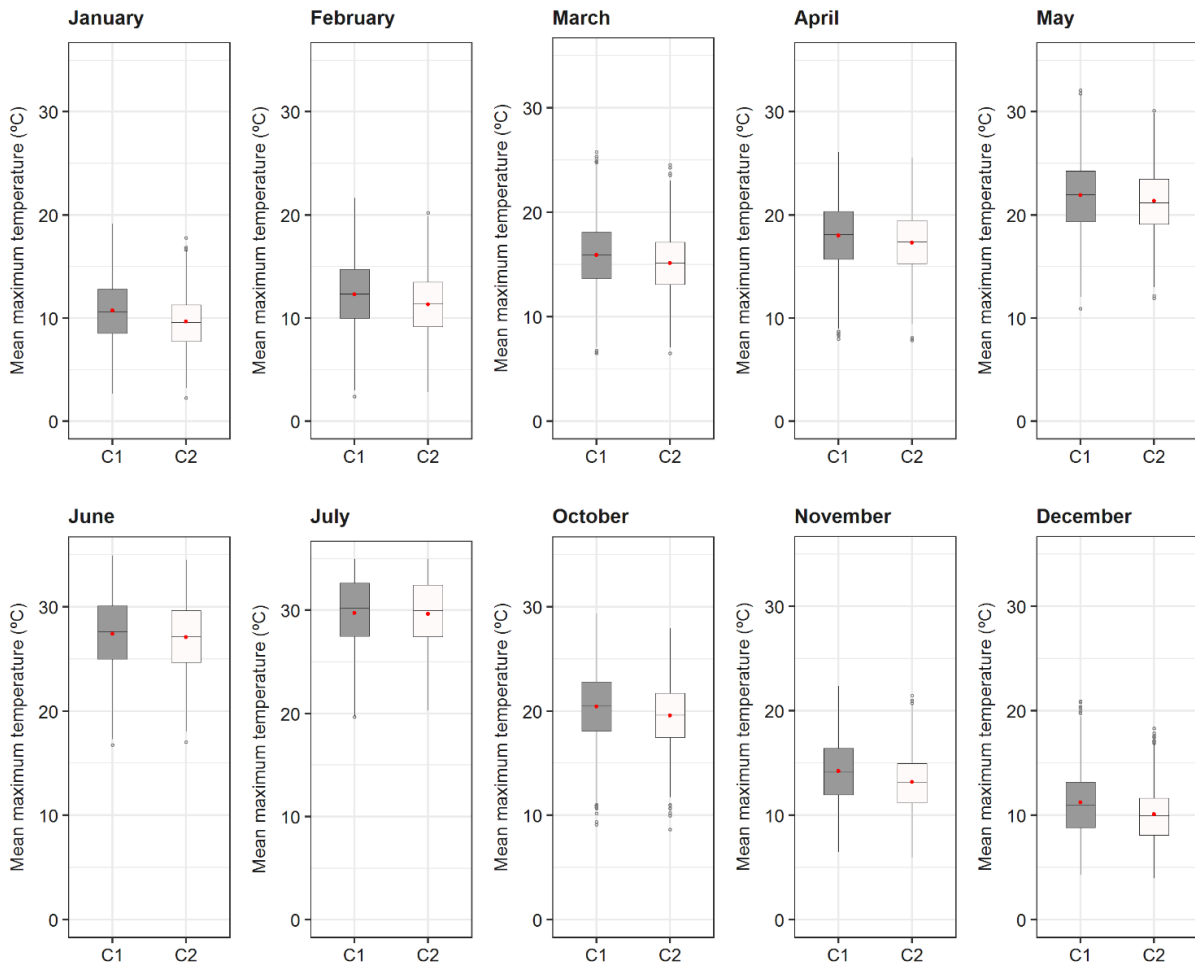

26

27 Supplementary Fig. 4. As for Supplementary Fig. 2, but for the monthly mean maximum temperature.

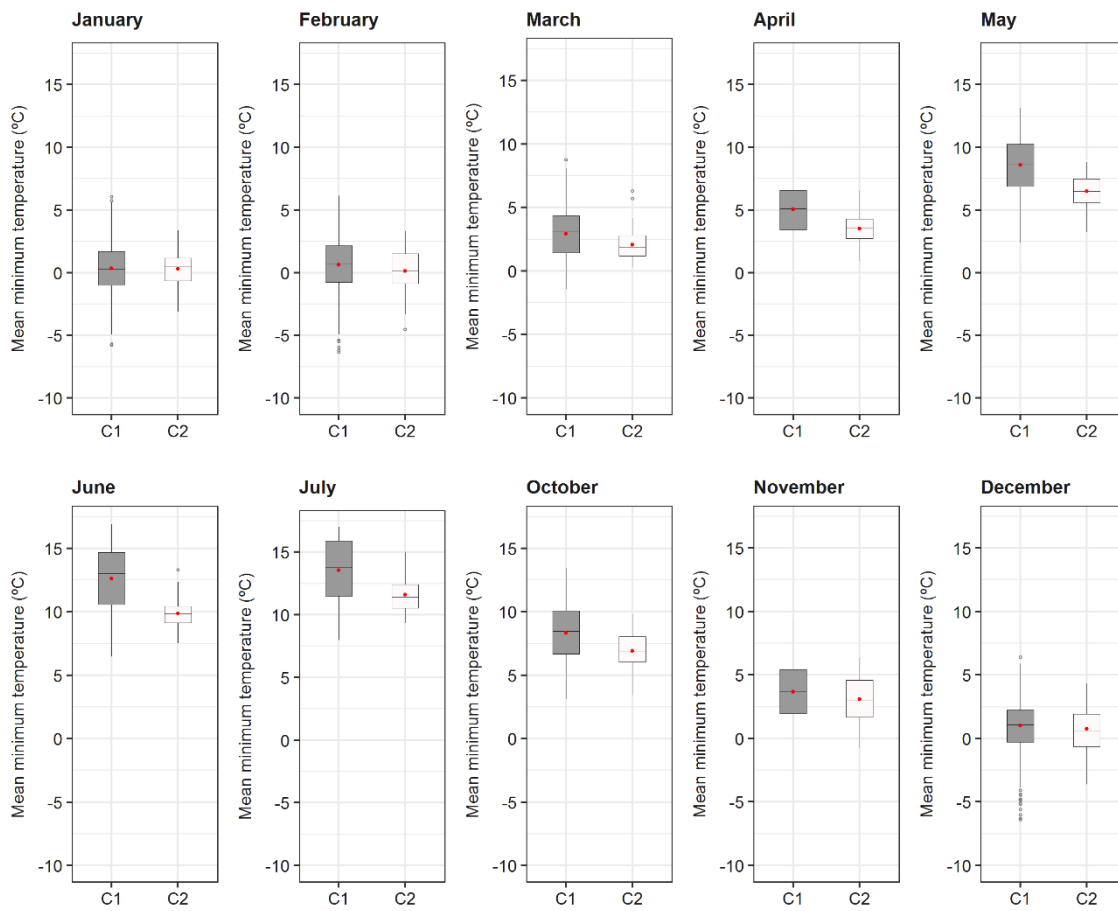

28

29 Supplementary Fig. 5. As for Supplementary Fig. 2, but for the monthly mean minimum temperature.

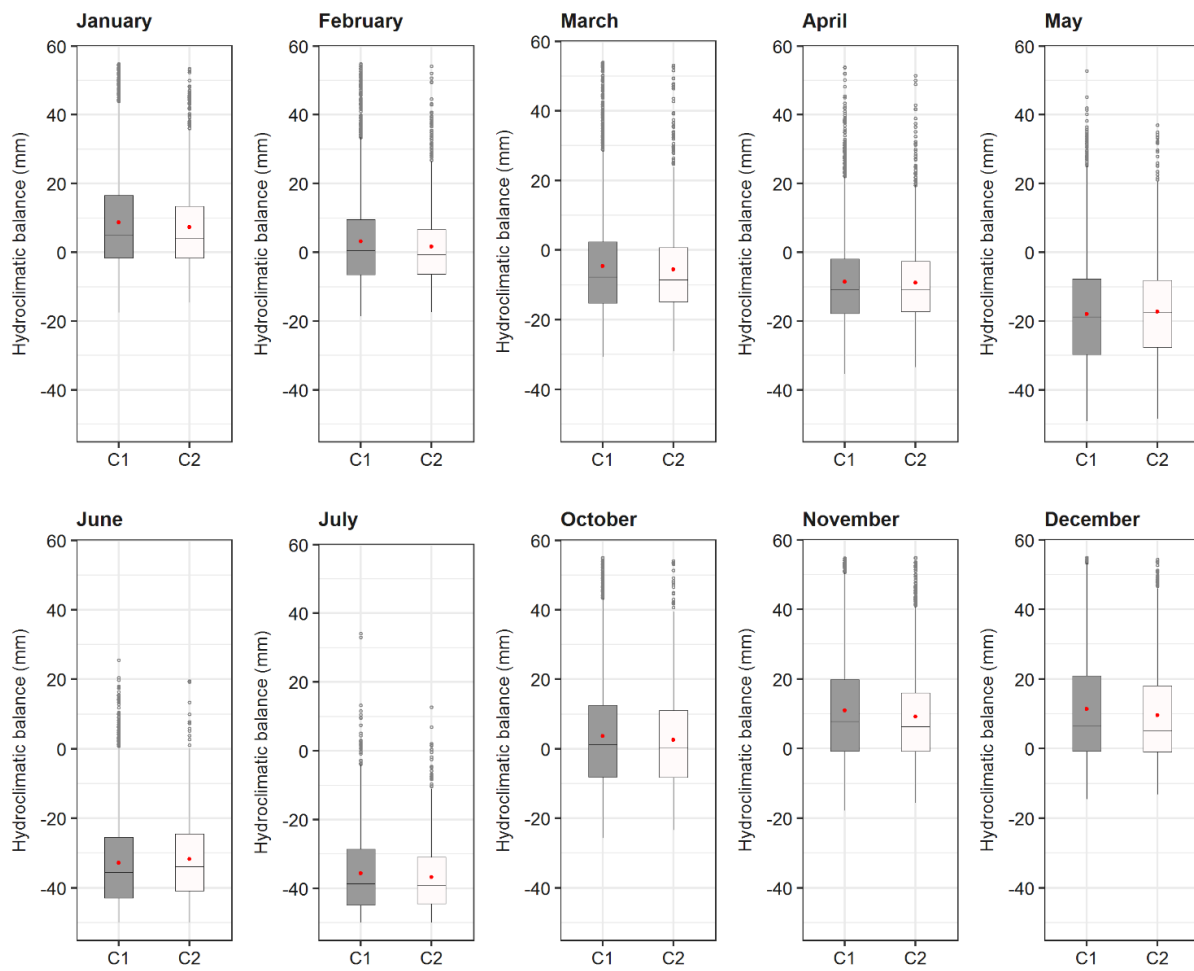

30

31 Supplementary Fig. 6. As for Supplementary Fig. 2, but for the monthly mean hydroclimate balance.

32

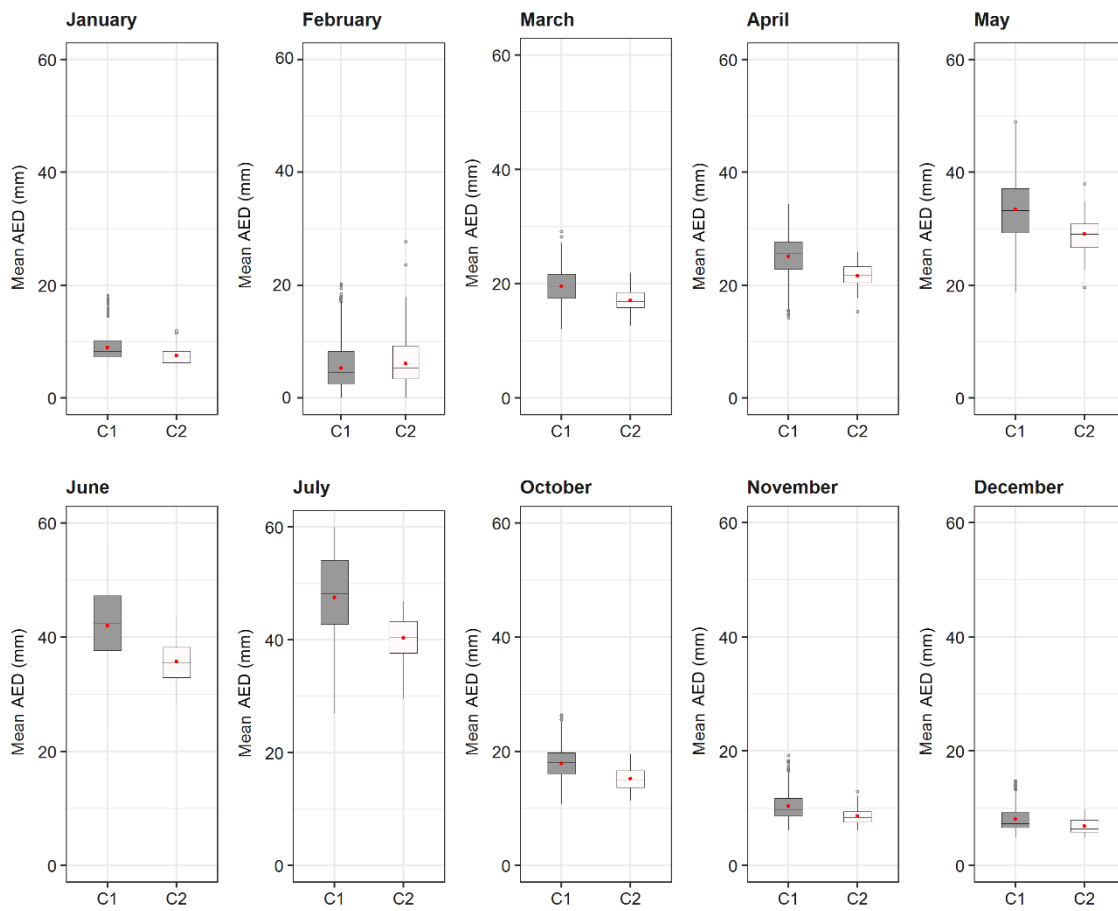

33

34 Supplementary Fig. 7. Monthly mean AED conditions in the agricultural districts where barley was cultivated, classified into  
 35 principal components (C1 and C2) for the period 1993–2015. The red dot show the mean, and black line shows the median.



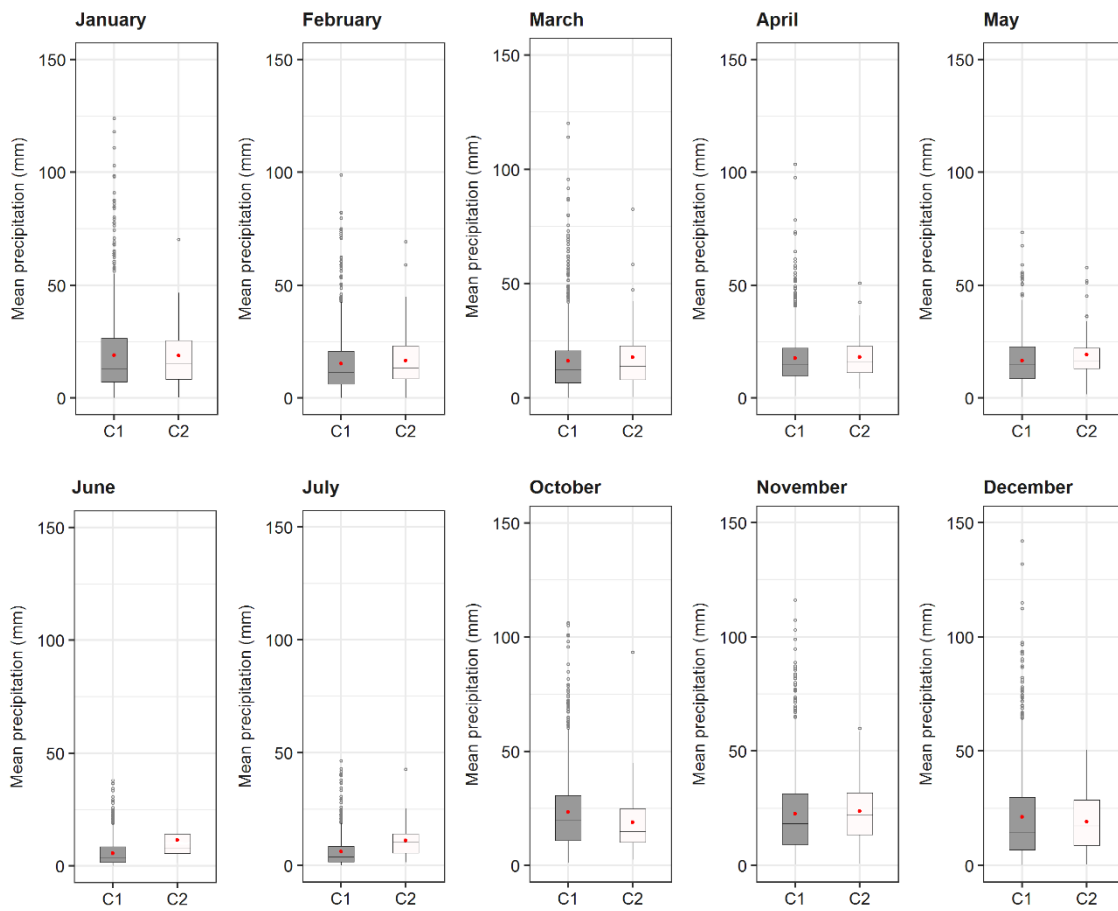

36

37 Supplementary Fig. 8. As for Supplementary Fig. 7, but for the monthly mean precipitation.

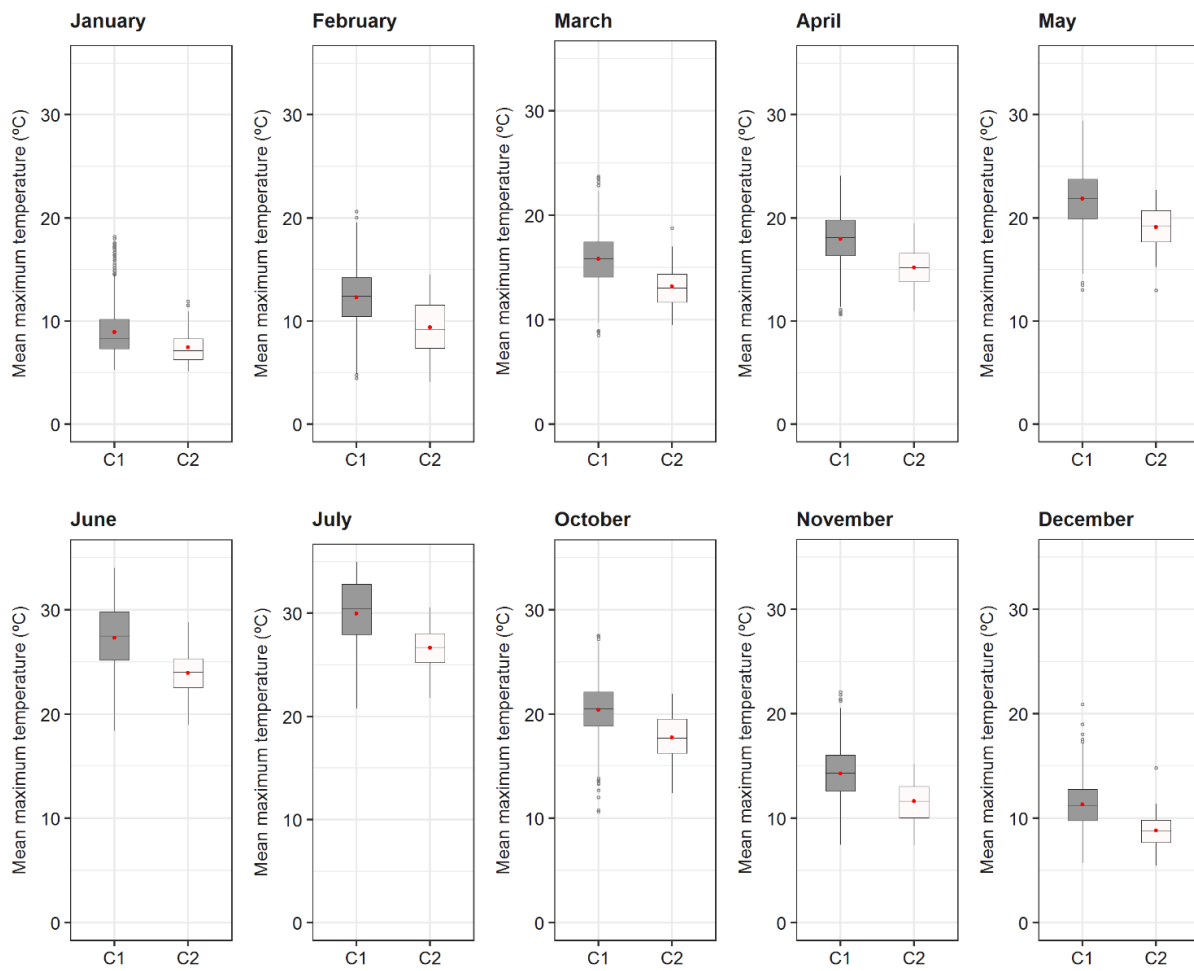

38

39 Supplementary Fig. 9. As for Supplementary Fig. 7, but for the monthly mean maximum temperature.

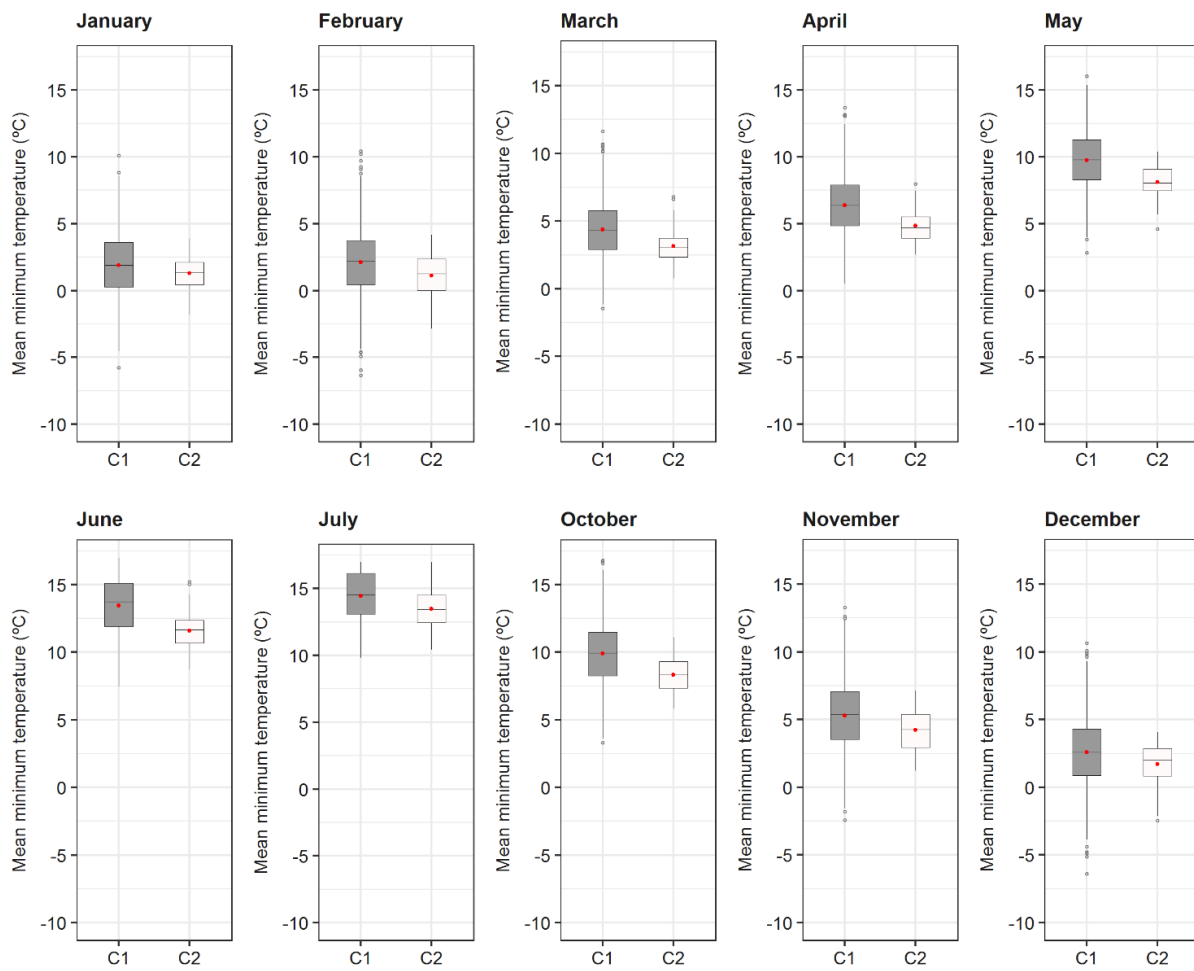

40

41 Supplementary Fig. 10. As for Supplementary Fig. 7, but for the monthly mean minimum temperature.

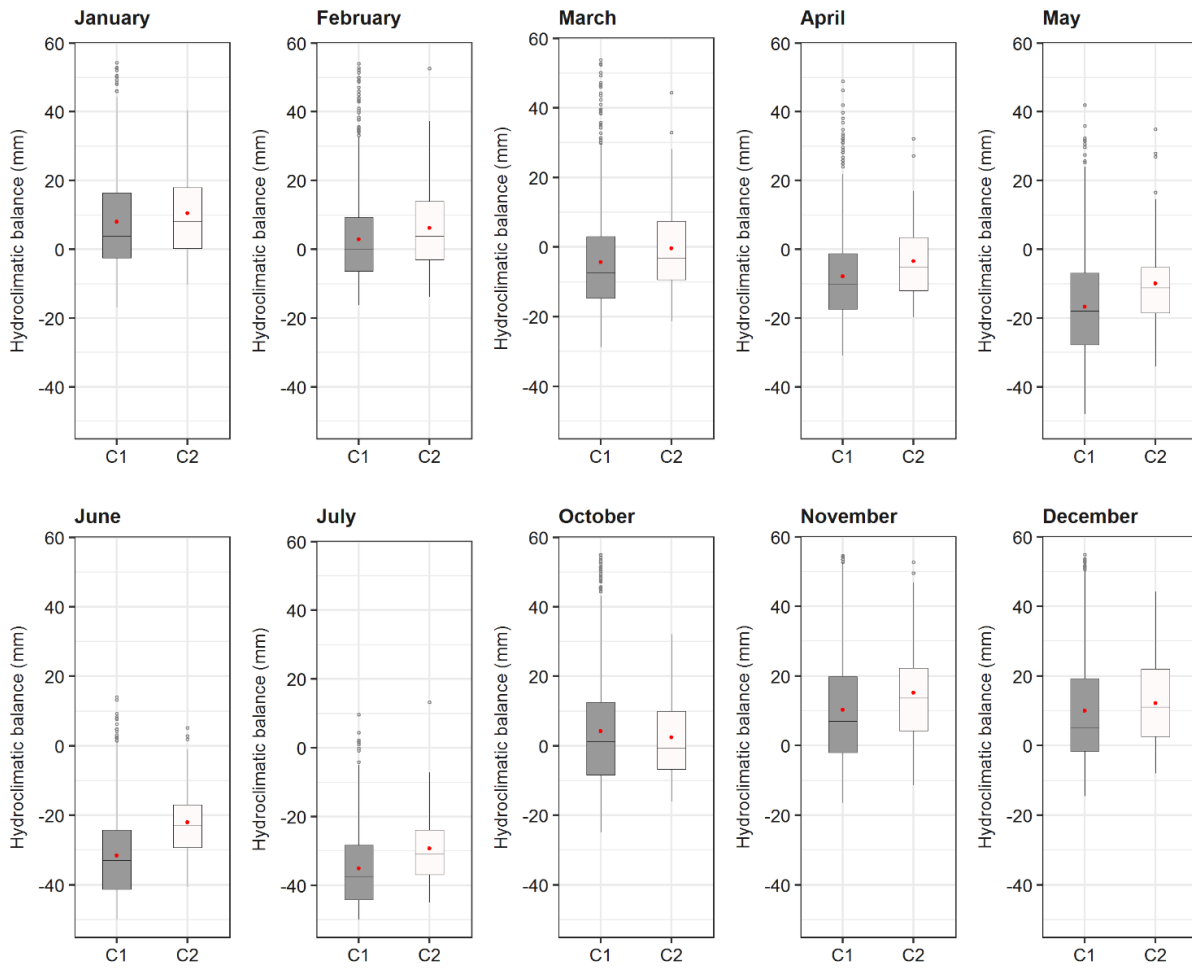

42

43 Supplementary Fig. 11. As for Supplementary Fig. 7, but for the monthly mean hydroclimate balance.

44

45
